# Supplementary material
Source: PubMed Central journal article supplement (PMC8553556)
Supplement: jci-131-150613-s090.pdf [file jci-131-150613-s090.pdf]

## Supplementary Materials for

# Seasonal coronavirus-specific B-cells with limited SARS-CoV-2 cross-reactivity dominate the IgG response in severe COVID-19 patients

Muriel Aguilar-Bretones<sup>1\*</sup>, Brenda M. Westerhuis<sup>1\*</sup>, Matthijs P. Raadsen<sup>1</sup>, Erwin de Bruin<sup>1</sup>, Felicity D. Chandler<sup>1</sup>, Nisreen M.A. Okba<sup>1</sup>, Bart L. Haagmans<sup>1</sup>, Thomas Langerak<sup>1</sup>, Henrik Endeman<sup>2</sup>, Johannes P.C. van den Akker<sup>2</sup>, Diederik A.M.P.J. Gommers<sup>2</sup>, Eric C.M. van Gorp<sup>1</sup>, Corine H. GeurtsvanKessel<sup>1</sup>, Rory D. de Vries<sup>1</sup>, Ron A.M. Fouchier<sup>1</sup>, Barry H.G. Rockx<sup>1</sup>, Marion P.G. Koopmans<sup>1</sup> and Gijsbert P. van Nierop<sup>1†</sup>

**\*Shared first authorship:** Both authors provided critical contributions and are listed alphabetically by surname.

**†Correspondence:** Dr. Gijsbert P. van Nierop, Erasmus Medical Center, Wytemaweg 80, 3015CE, Rotterdam, the Netherlands, T: +31107032134, E: [g.p.vannierop@erasmusmc.nl](mailto:g.p.vannierop@erasmusmc.nl)

### The PDF file includes:

**Supplementary Figure 1.** Serum IgG titers and IgG B-cell clone reactivity towards N of SARS-CoV and SARS-CoV-2 are strongly correlated.

**Supplementary figure 2.** Boosted OC43-S<sub>ECTO</sub> clones recognize epitopes in OC43-S<sub>2</sub>.

**Supplementary figure 3.** Clonal IgG response of a disease control patient towards OC43-, MERS- and SARS2-S<sub>ECTO</sub>.

**Supplementary Table 1.** Antigens used in this study and a list of references

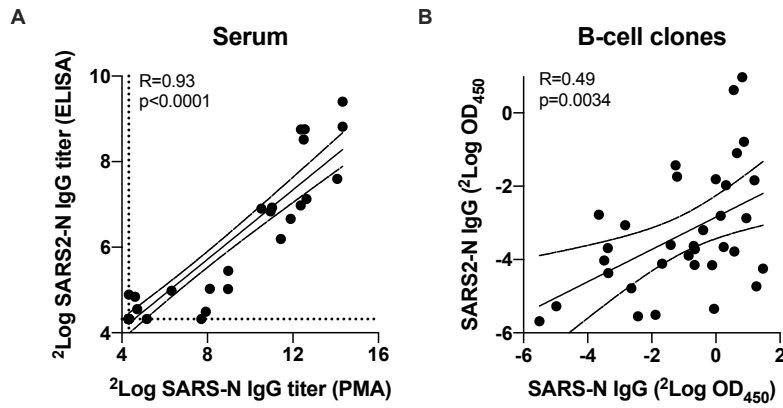

**Supplementary figure 1. Serum IgG titers and IgG B-cell clone reactivity towards N of SARS-CoV and SARS-CoV-2 are strongly correlated. A)** Serum IgG titers against nucleocapsid (N) of SARS-CoV (SARS-N) and SARS-CoV-2 (SARS2-N) were determined using protein microarray (PMA) and ELISA, respectively. Horizontal and vertical dashed lines indicate assay background of PMA and ELISA, respectively. **B)** Culture supernatants of selected SARS-N-reactive IgG B-cell clones were tested for SARS-N and SARS2-N using ELISA. Linear regression shows that both serum IgG titers and B-cell clones significantly correlated. Solid line depicts the best-fit regression coefficient. Dashed line shows the 95% confidence of the best-fit line.

## OC43-Secto reactive clones

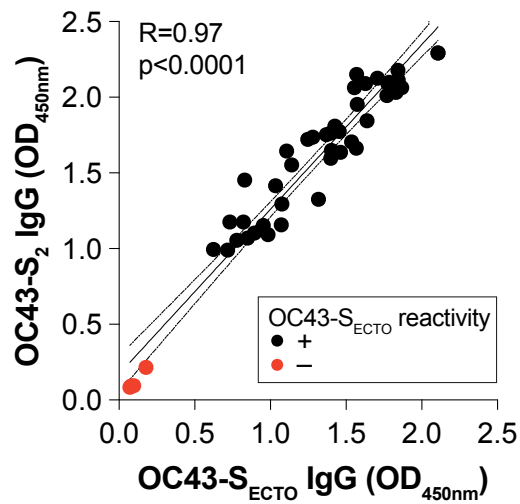

**Supplementary figure 2. Boosted OC43-S<sub>ecto</sub> clones recognize epitopes in OC43-S<sub>2</sub>.** A random selection of boosted OC43-S<sub>ecto</sub> reactive clones that did not show cross-reactivity towards OC43-S<sub>1</sub> (black dots, n=43) were screened using OC43-S and OC43-S<sub>2</sub> on ELISA. Non-reactive clones were included as a negative control (red dots, n=3). The significant correlation suggests all selected boosted OC43-S<sub>ecto</sub> targeted an epitope within S<sub>2</sub> (linear regression analysis).

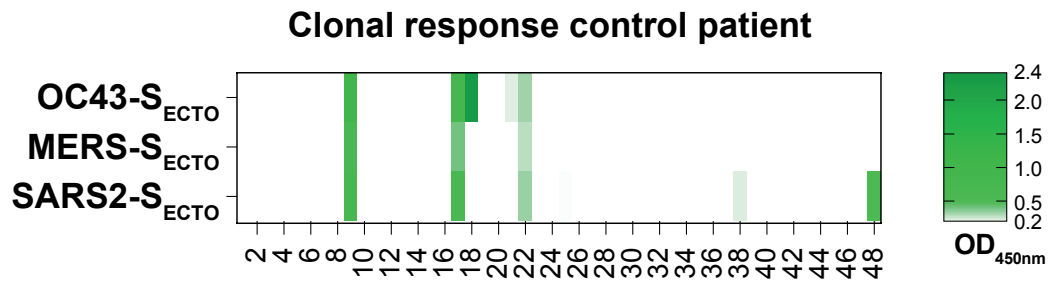

**Supplementary figure 3. Clonal IgG response of a disease control patient towards OC43-, MERS- and SARS2-S<sub>ECTO</sub>.** B-cells were isolated from PBMC of a disease control patient and stimulated in vitro at limiting dilution to ensure clonal reactivity. Culture supernatants were screened for IgG reactivity towards the ectodomain of spike from HCoV-OC43, MERS-CoV and SARS-CoV-2 to supplement MERS-S<sub>ECTO</sub> protein microarray results. Three clones that cross-react with MERS-S<sub>ECTO</sub> were identified.

**Supplementary Table 1. Antigens used in this study**

| Antigen                 | <sup>a</sup> Use | Source or reference                         | <sup>b</sup> Production system | Amino acid residues and ref sequence | <sup>c</sup> Tag             |
|-------------------------|------------------|---------------------------------------------|--------------------------------|--------------------------------------|------------------------------|
| 229E-N                  | P                | Medix Biochemica (Cat.No: 610091)           | E. coli                        |                                      | N-term His-tag               |
| NL63-N                  | P                | Medix Biochemica (Cat.No: 610041)           | E. coli                        |                                      | N-term His-tag               |
| HKU1-N                  | P                | Medix Biochemica (Cat.No: 610042)           | E. coli                        |                                      | N-term His-tag               |
| OC43-N                  | P                | Medix Biochemica (Cat.No: 610040)           | E. coli                        |                                      | N-term His-tag               |
| MERS-N                  | P                | Sino biological (Cat.No: 40068-V08B)        | BIC                            |                                      | C-term His-tag               |
| SARS-N                  | E, P             | Sino biological (Cat. No: 40143-V08B)       | BIC                            |                                      | C-term His-tag               |
| SARS2-N                 | E                | Sino biological (Cat. No: 40158-V08B)       | BIC                            |                                      | C-term His-tag               |
| NL63-S <sub>ECTO</sub>  | P                | Kindly provided by Dr. Berend Jan Bosch (1) | DS2                            | 16-1291, UniProt Q6Q1S2              | C-term GCN4, Strep-tag       |
| HKU1-S <sub>ECTO</sub>  | P                | Kindly provided by Dr. Berend Jan Bosch (2) | HEK293T                        | 14-1266, GenBank HM034837            | C-term T4T, mFCS, Strep-tag  |
| OC43-S <sub>ECTO</sub>  | E, P             | Kindly provided by Dr. Berend Jan Bosch (3) | HEK293F                        | 15-1263, UniProt Q696P8              | C-term GCN4, mFCS, Strep-tag |
| MERS-S <sub>ECTO</sub>  | P                | Kindly provided by Dr. Berend Jan Bosch (2) | BIC                            | 19-1262, GenBank YP_009047204.1      | C-term T4T, mFCS, Strep-tag  |
| MERS-S <sub>ECTO</sub>  | E                | Sino biological (Cat.No: 40069-V08B)        | BIC                            |                                      | C-term His-tag               |
| SARS-S <sub>ECTO</sub>  | P                | Kindly provided by Dr. Berend Jan Bosch (4) | HEK293F                        | 1-1160, GenBank AAP13567.1           | C-term T4T, mFCS, Strep-tag  |
| SARS2-S <sub>ECTO</sub> | P                | Kindly provided by Dr. Berend Jan Bosch (5) | HEK293T                        | 1-1200, GenBank QHD43416.1           | C-term T4T, mFCS, Strep-tag  |
| 229E-S <sub>1</sub>     | P                | Generated in-house (6)                      | HEK293T                        | 1-537                                | Mouse Fc-tag                 |
| NL63-S <sub>1</sub>     | P                | Generated in-house (6)                      | HEK293T                        | 1-717                                | Mouse Fc-tag                 |
| HKU1-S <sub>1</sub>     | P                | Generated in-house (6)                      | HEK293T                        | 1-750                                | Mouse Fc-tag                 |
| OC43-S <sub>1</sub>     | P                | Generated in-house (6)                      | HEK293T                        | 1-760                                | Mouse Fc-tag                 |
| MERS-S <sub>1</sub>     | P                | Generated in-house (6)                      | HEK293T                        | 1-751                                | Mouse Fc-tag                 |
| SARS-S <sub>1</sub>     | P                | Generated in-house (6)                      | HEK293T                        | 1-676                                | Mouse Fc-tag                 |
| SARS2-S <sub>1</sub>    | P                | Generated in-house (6)                      | HEK293T                        | 1-674                                | Mouse Fc-tag                 |
| SARS2-S <sub>RBD</sub>  | P                | Generated in-house (6)                      | HEK293T                        | 329-538                              | Mouse Fc-tag                 |
| OC43-S <sub>2</sub>     | E                | Sino biological (40607-V08B1)               | BIC                            |                                      | His-tag                      |
| HA H1N1(2009)           | E                | Protein Sciences corporation                | BIC                            |                                      |                              |

<sup>a</sup>Antigen was used in ELISA (E) or protein microarray (P)

<sup>b</sup>Antigen was produced in Escheria coli (E.coli), Drosophila S2 cells (DS2), Baculovirus infected insect cells (BIC), human embryonic kidney cells clone 293 transformed with SV40 T antigen (HEK293T) or Freestyle HEK293 (HEK293F)

<sup>c</sup>Antigen contains a transcription factor GCN4 trimerization motif (GCN4), T4 fibrin trimerization motif (T4T), mutated S1/S2 furin cleavage site (mFCS), Histidine-tag (His-tag), Streptavidin-tag (Strep-tag)

## References

1. A. C. Walls, M. A. Tortorici, B. Frenz, J. Snijder, W. Li, F. A. Rey, F. DiMaio, B. J. Bosch, D. Velesler, Glycan shield and epitope masking of a coronavirus spike protein observed by cryo-electron microscopy. *Nat. Struct. Mol. Biol.* **23**, 899–905 (2016).
2. C. Wang, R. van Haperen, J. Gutiérrez-Álvarez, W. Li, N. M. A. Okba, I. Albuлесcu, I. Widjaja, B. van Dieren, R. Fernandez-Delgado, I. Sola, D. L. Hurdiss, O. Daramola, F. Grosveld, F. J. M. van Kuppeveld, B. L. Haagmans, L. Enjuanes, D. Drabek, B. J. Bosch, Isolation of cross-reactive monoclonal antibodies against divergent human coronaviruses that delineate a conserved and vulnerable site on the spike protein. *bioRxiv* (2020), p. 2020.10.20.346916, , doi:10.1101/2020.10.20.346916.
3. I. Widjaja, C. Wang, R. van Haperen, J. Gutiérrez-Álvarez, B. van Dieren, N. M. A. Okba, V. S.

- Raj, W. Li, R. Fernandez-Delgado, F. Grosveld, F. J. M. van Kuppeveld, B. L. Haagmans, L. Enjuanes, D. Drabek, B. J. Bosch, Towards a solution to MERS: protective human monoclonal antibodies targeting different domains and functions of the MERS-coronavirus spike glycoprotein. *Emerg. Microbes Infect.* **8**, 516–530 (2019).
4. J. Fedry, D. L. Hurdiss, C. Wang, W. Li, G. Obal, I. Drulyte, S. C. Howes, F. J. M. van Kuppeveld, F. Förster, B. J. Bosch, A human monoclonal antibody targeting a conserved pocket in the SARS-CoV-2 receptor-binding domain core. *bioRxiv* (2020), p. 2020.09.30.318261, , doi:10.1101/2020.09.30.318261.
  5. M. Alejandra Tortorici, A. C. Walls, Y. Lang, C. Wang, Z. Li, D. Koerhuis, G. J. Boons, B. J. Bosch, F. A. Rey, R. J. de Groot, D. Velesler, Structural basis for human coronavirus attachment to sialic acid receptors. *Nat. Struct. Mol. Biol.* **26**, 481–489 (2019).
  6. N. M. A. Okba, M. A. Müller, W. Li, C. Wang, C. H. Geurtsvankessel, V. M. Corman, M. M. Lamers, R. S. Sikkema, E. De Bruin, F. D. Chandler, Y. Yazdanpanah, Q. Le Hingrat, D. Descamps, N. Houhou-Fidouh, C. B. E. M. Reusken, B. J. Bosch, C. Drosten, M. P. G. Koopmans, B. L. Haagmans, Severe acute respiratory syndrome coronavirus 2-specific antibody responses in coronavirus disease patients. *Emerg. Infect. Dis.* **26**, 1478–1488 (2020).
